# Supplementary material for: Implementation of a complex intervention to improve hospital discharge: process evaluation of a cluster randomised controlled trial
Source: PubMed Central journal article supplement — BMJ Open. 2021 May 27;11(5):e049872. doi: 10.1136/bmjopen-2021-049872 (PMC8162085; doi:10.1136/bmjopen-2021-049872), 2021-05-27
Supplement: bmjopen-2021-049872supp001.pdf [file bmjopen-2021-049872supp001.pdf]

## Online supplementary appendix 1

**Discharge-Checklist**

Patient-ID: .....

Date: .....

|                                                                                                                                                                                                                                                                                                                                                                                                                                                                                                                       | Yes                                                                                                                                      | No                                                                                                                                       |
|-----------------------------------------------------------------------------------------------------------------------------------------------------------------------------------------------------------------------------------------------------------------------------------------------------------------------------------------------------------------------------------------------------------------------------------------------------------------------------------------------------------------------|------------------------------------------------------------------------------------------------------------------------------------------|------------------------------------------------------------------------------------------------------------------------------------------|
| 1: Have you collected the <b>main complaint</b> of the patient?                                                                                                                                                                                                                                                                                                                                                                                                                                                       | <input type="checkbox"/>                                                                                                                 | <input type="checkbox"/>                                                                                                                 |
| 2: Have you and your patient discussed the <b>treatment goals from his own point of view</b> ?                                                                                                                                                                                                                                                                                                                                                                                                                        | <input type="checkbox"/>                                                                                                                 | <input type="checkbox"/>                                                                                                                 |
| 3: Have you compiled a full list of all the patient's <b>drugs at admission</b> ?                                                                                                                                                                                                                                                                                                                                                                                                                                     | <input type="checkbox"/>                                                                                                                 | <input type="checkbox"/>                                                                                                                 |
| 4: Have you decided for every single drug whether <ul style="list-style-type: none"> <li>▪ the patient will indeed <b>take it as prescribed</b>?</li> <li>▪ the <b>indication</b> of the drug is correct for this patient?</li> <li>▪ the <b>risk of side effects</b> (present or expected) is less than the benefit incurred?</li> <li>▪ the <b>dose</b> is correct for this individual patient (age, comorbidities)?</li> <li>▪ there is no <b>alternative drug</b> with a better benefit-to-risk ratio?</li> </ul> | <input type="checkbox"/><br><input type="checkbox"/><br><input type="checkbox"/><br><input type="checkbox"/><br><input type="checkbox"/> | <input type="checkbox"/><br><input type="checkbox"/><br><input type="checkbox"/><br><input type="checkbox"/><br><input type="checkbox"/> |
| 5: Have you decided whether a <b>new drug</b> is indicated?                                                                                                                                                                                                                                                                                                                                                                                                                                                           | <input type="checkbox"/>                                                                                                                 | <input type="checkbox"/>                                                                                                                 |
| 6: Did you <b>involve the patient</b> in the changes you are proposing?                                                                                                                                                                                                                                                                                                                                                                                                                                               | <input type="checkbox"/>                                                                                                                 | <input type="checkbox"/>                                                                                                                 |
| 7: Have you provided the patient with a <b>discharge medication list</b> together with an invitation to use it?                                                                                                                                                                                                                                                                                                                                                                                                       | <input type="checkbox"/>                                                                                                                 | <input type="checkbox"/>                                                                                                                 |
| 8: Have you motivated the patient to consult the family doctor/general practitioner <b>within 7 days</b> ?                                                                                                                                                                                                                                                                                                                                                                                                            | <input type="checkbox"/>                                                                                                                 | <input type="checkbox"/>                                                                                                                 |
| 9: Did you send the <b>list of modified or newly introduced</b> medications to the family doctor/general practitioner?                                                                                                                                                                                                                                                                                                                                                                                                | <input type="checkbox"/>                                                                                                                 | <input type="checkbox"/>                                                                                                                 |
| 10: Have you offered the family doctor/general practitioner <b>to discuss</b> medication changes?                                                                                                                                                                                                                                                                                                                                                                                                                     | <input type="checkbox"/>                                                                                                                 | <input type="checkbox"/>                                                                                                                 |

11: Was there any **contact with the general practitioner during the hospital stay** in view of the imminent discharge of the patient? ☐ Yes / ☐ No

Discharging Physician:

Name: ..... Junior HP ☐ / Senior HP ☐ Signature: .....

Thank you very much!
