# Supplementary material for: Implementation of a complex intervention to improve hospital discharge: process evaluation of a cluster randomised controlled trial
Source: PubMed Central journal article supplement — BMJ Open. 2021 May 27;11(5):e049872. doi: 10.1136/bmjopen-2021-049872 (PMC8162085; doi:10.1136/bmjopen-2021-049872), 2021-05-27
Supplement: bmjopen-2021-049872supp003.pdf [file bmjopen-2021-049872supp003.pdf]

## Online supplementary appendix 3

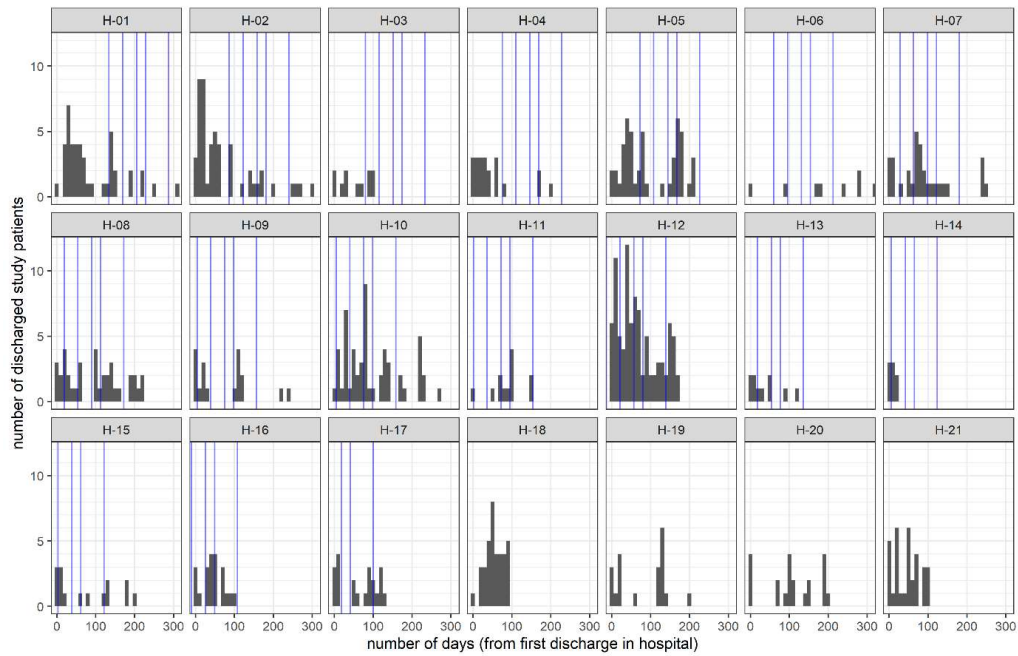

**Numbers of discharged study participants (patients) over time, per hospital.** Time was adjusted to the date of the hospital's first study patient discharge. Blue vertical lines indicate dates of newsletter dispatch. Hospitals that started study activities later due to COVID-19 no longer received newsletters.
